# Supplementary material
Source: ML conference proceedings conference paper supplement (https://openreview.net/forum?id=VtPjK2D0rL)
Supplement: supplementary_material [file attachment]

# Supplementary Materials: Disentangled-Multimodal Privileged Knowledge Distillation for Depression Recognition with Incomplete Multimodal Data

Anonymous Authors

## 1 ANALYSIS OF PRIVILEGED KNOWLEDGE DISTILLATION

We present the full data of Fig.3 across all validated datasets, illustrating the performance of direct recognition using the student model before and after knowledge distillation. This comparison highlights the impact of privileged knowledge from Dis2DR on recognition from incomplete modalities. Detailed comparison results are presented in Tab. 1 and Tab. 2.

**Table 1: The performance of Dis2DR before privileged knowledge distilling on AVEC datasets.**

| Input Modality | AVEC 2013   |             | AVEC 2014   |             | AVEC 2017   |             | AVEC 2019   |             |
|----------------|-------------|-------------|-------------|-------------|-------------|-------------|-------------|-------------|
|                | MAE↓        | RMSE↓       | MAE↓        | RMSE↓       | MAE↓        | RMSE↓       | MAE↓        | RMSE↓       |
| A              | 15.30       | 17.82       | 15.41       | 17.90       | 7.40        | 8.28        | 6.56        | 7.56        |
| V              | 11.70       | 13.64       | 11.66       | 13.54       | 5.40        | 6.10        | 5.46        | 6.25        |
| T              | 7.88        | 9.70        | 8.08        | 9.72        | 4.75        | 5.51        | 4.56        | 5.54        |
| A+V            | 11.88       | 13.75       | 11.74       | 13.56       | 5.43        | 6.16        | 5.46        | 6.22        |
| A+T            | 8.01        | 9.77        | 8.17        | 9.82        | 4.84        | 5.56        | 4.51        | 5.52        |
| V+T            | 5.65        | 6.81        | 5.42        | 6.53        | 4.65        | 5.23        | 3.99        | 4.76        |
| A+V+T          | <b>5.58</b> | <b>6.76</b> | <b>5.38</b> | <b>6.51</b> | <b>3.74</b> | <b>4.52</b> | <b>3.99</b> | <b>4.72</b> |

**Table 2: The performance of Dis2DR after privileged knowledge distilling on AVEC datasets.**

| Input Modality | AVEC 2013   |             | AVEC 2014   |             | AVEC 2017   |             | AVEC 2019   |             |
|----------------|-------------|-------------|-------------|-------------|-------------|-------------|-------------|-------------|
|                | MAE↓        | RMSE↓       | MAE↓        | RMSE↓       | MAE↓        | RMSE↓       | MAE↓        | RMSE↓       |
| A              | 11.65       | 13.45       | 11.69       | 13.46       | 5.68        | 6.51        | 5.41        | 6.34        |
| V              | 7.10        | 9.31        | 7.59        | 9.11        | 4.84        | 5.56        | 5.27        | 6.37        |
| T              | 6.01        | 7.43        | 6.15        | 7.45        | 4.17        | 4.93        | 3.66        | 4.41        |
| A+V            | 8.90        | 10.59       | 8.67        | 10.38       | 4.82        | 5.55        | 4.23        | 5.28        |
| A+T            | 5.97        | 7.37        | 6.06        | 7.32        | 4.48        | 5.19        | 4.10        | 5.12        |
| V+T            | 5.75        | 7.06        | 5.17        | 6.47        | 4.20        | 4.99        | 3.73        | 4.45        |
| A+V+T          | <b>5.75</b> | <b>7.04</b> | <b>5.12</b> | <b>6.40</b> | <b>3.66</b> | <b>4.44</b> | <b>3.39</b> | <b>4.18</b> |
